# Supplementary material for: The influence of residual force enhancement on spinal and supraspinal excitability
Source: PeerJ. 2018 Aug 3;6:e5421. doi: 10.7717/peerj.5421 (PMC6078065; doi:10.7717/peerj.5421)
Supplement: Supplemental Information 1 [file peerj-06-5421-s001.xlsx]

## Sheet: Data
Subject	Mmax		CMEP		MEP		CMEP/Mmax		Norm MEP		Torque		TA Mmax	SOL Mmax	TA EMGrms (MEP)		TA EMG Norm		SOL EMGrms (MEP)		SOL EMG Norm		TA EMGrms (CMEP)		SOL EMGrms (CMEP)
	ISO	RFE	ISO	RFE	ISO	RFE	ISO	RFE	ISO	RFE	ISO	RFE	RMS	RMS	ISO	RFE	ISO	RFE	ISO	RFE	ISO	RFE	ISO	RFE	ISO	RFE
S1	12.4078	12.184	3.892	4.089	4.25625	3.483	0.319758	0.342563	1.32649	0.818297	24.5446	26.455	3.06318	5.15968	0.719413	0.718561	0.234858	0.23458	0.219709	0.214161	0.042582	0.0454641	0.766459	0.784563	0.245933	0.239376
S2	14.3313	13.6557	5.132	5.245	6.75467	6.22067	0.364825	0.374696	1.21376	1.50543	15.5135	15.7615	3.31541	5.07073	0.840485	0.787611	0.253508	0.23756	0.338884	0.321346	0.0668314	0.0468494	0.816665	0.853817	0.328245	0.332117
S3	11.5623	10.9662	5.28	5.115	5.70325	5.2785	0.454832	0.467284	1.09904	1.12841	11.9674	12.7345	3.1297	5.59079	0.415635	0.444722	0.132803	0.142097	0.169486	0.170228	0.0303152	0.0254163	0.435298	0.393859	0.17508	0.169929
S4	10.2497	10.7787	3.901	1.293	2.63	2.03333	0.387581	0.129624	1.25891	2.53055	15.7757	17.0796	2.50393	6.8586	0.477769	0.518225	0.190808	0.206964	0.160872	0.164227	0.0234555	0.0301759	0.451239	0.567376	0.15453	0.174997
S5	11.2865	9.507	4.538	3.599	5.572	5.293	0.391038	0.380645	1.29881	1.4579	17.5371	17.7389	2.52199	3.70452	0.543323	0.590505	0.215434	0.234143	0.173637	0.186368	0.0468717	0.0632045	0.608189	0.505399	0.18447	0.159566
S6	8.0565	8.4105	3.8235	2.452	4.77	2.0025	0.482023	0.297692	1.29851	0.95735	14.9601	15.985	1.99095	4.08975	0.404712	0.409631	0.203276	0.205747	0.166733	0.159072	0.0407685	0.0503079	0.436193	0.454128	0.177443	0.184572
S7	14.1617	17.338	6.533	6.558	2.81467	6.01067	0.397481	0.362741	0.368131	0.780573	20.5887	22.8128	4.004	5.27776	1.18031	1.24867	0.294783	0.311856	0.421603	0.396679	0.0798829	0.0590886	0.985764	0.984137	0.328709	0.307893
S8	13.7937	12.1597	7.59933	7.56767	5.84533	6.403	0.558916	0.626369	0.78224	0.852463	14.7403	16.7066	2.67508	2.15719	1.06122	1.0744	0.396705	0.401632	0.360552	0.333264	0.167139	0.186182	1.19325	1.07451	0.398443	0.341402
S9	14.7188	16.1875	7.7875	6.0355	4.82025	4.82875	0.505461	0.350433	0.711651	0.87775	11.246	13.3292	3.82595	4.59887	0.956843	0.958321	0.250093	0.250479	0.233047	0.231368	0.0506748	0.0544654	1.07702	0.884752	0.269765	0.205243
S10	13.224	11.799	4.3985	2.352	6.446	5.782	0.332416	0.200554	1.47154	2.45156	9.86429	12.1687	3.11311	6.21913	0.480676	0.496739	0.154404	0.159564	0.16653	0.166363	0.0267771	0.0256569	0.509355	0.543811	0.168485	0.186684
S11	12.474	12.858	7.096	5.398	6.037	5.414	0.568863	0.419816	0.850761	1.00296	8.77883	9.83636	2.81948	3.30784	0.78985	0.671695	0.28014	0.238233	0.227194	0.178432	0.0686834	0.0720209	0.744919	0.750917	0.208527	0.220667
